# Supplementary material for: Broad-host-range vector system for synthetic biology and biotechnology in cyanobacteria
Source: PubMed Central journal article supplement (PMC4176158; doi:10.1093/nar/gku673), 2014-07-29
Supplement: supp_gku673_nar-01291-met-g-2014-File008.pdf [file supp_gku673_nar-01291-met-g-2014-File008.pdf]

## SUPPLEMENTARY MATERIAL

### **Broad-host-range vector system for synthetic biology and biotechnology in cyanobacteria**

Arnaud Taton<sup>1,\*</sup>, Federico Unglaub<sup>1</sup>, Nicole E. Wright<sup>1</sup>, Wei Yue Zeng<sup>1</sup>, Javier Paz-Yepez<sup>2,3</sup>, Bianca Brahamsha<sup>2</sup>, Brian Palenik<sup>2</sup>, Todd C. Peterson<sup>4,5</sup>, Farzad Haerizadeh<sup>4,6</sup>, Susan S. Golden<sup>1</sup>, and James W. Golden<sup>1,\*</sup>

<sup>1</sup>Division of Biological Sciences, University of California San Diego, 9500 Gilman Dr., La Jolla, CA 92093, USA

<sup>2</sup>Scripps Institution of Oceanography, University of California San Diego, 9500 Gilman Dr., La Jolla, CA 92093, USA

<sup>3</sup>Institut de Biologie de l'Ecole Normale Supérieure, CNRS, UMR 8197, 46 rue d'Ulm, 75230 Paris, France

<sup>4</sup>Synthetic Biology Division, Life Technologies Corporation, 5791 Van Allen Way, Carlsbad, CA 92008, USA

<sup>5</sup>Present address: Synthetic Genomics, Inc. and Synthetic Genomics Vaccines, Inc, 11149 N Torrey Pines Rd., La Jolla, CA 92037, USA

<sup>6</sup>Present address: Intrexon Corporation, 6620 Mesa Ridge Rd, San Diego, CA 92121, USA

## SUPPLEMENTARY METHODS

### **Method S1. *In silico* construction of shuttle plasmids using the CYANO-VECTOR assembly**

**portal.** Donor plasmid sequences and annotations are stored into BioBIKE, a Web-based, programmable, integrated biological knowledge base (1). BioBIKE also bears the codes written to assemble devices into shuttle plasmids, to display sequences and maps, as well as to write GenBank files and protocols. In cases where the resulting plasmid is to be displayed as a DNA sequence, BioBIKE uses its integrated sequence viewer. For GenBank files, BioBIKE writes text files that are directly viewable in a web browser. GenBank files are written so that color codes, associated to the different parts (or features), are retained in the program ApE (A plasmid Editor). ApE is a multi-platform plasmid editor, commonly used and freely available at <http://biologylabs.utah.edu/jorgensen/wayned/ape/>. Maps are produced as XML (Extensible Markup Language) files conforming to CGView instructions. The CGView application (2), under control of BioBIKE code, then creates SVG (Scalable Vector Graphics) files, readily viewable in a web browser. Protocols for the *in vitro* construction of shuttle plasmids from selected devices are written as Microsoft Office XML (Excel) files. The BioBIKE functions were made accessible outside of the BioBIKE environment through the CYANO-VECTOR assembly portal using the Web API (or Web service) functionalities of BioBIKE. These Web APIs allow an interface (in this case: a JavaScript enhanced html form) to communicate arguments (donor plasmids, custom sequences, or actions such as display map, display sequence, display GenBank file, or write a protocol) to BioBIKE. BioBIKE then processes the arguments to construct the desired plasmid *in silico* and writes the files required for the plasmid to be displayed, exported, or constructed *in vitro*.

**Method S2. *In vitro* construction of shuttle plasmids.** Detailed protocols for the construction of new shuttle plasmids can be generated from the CYANO-VECTOR assembly portal as a Microsoft Office XML (Excel) document. This document provides the list of donor plasmids to be used, and the mixture composition for the restriction digests and the assembly reaction. DNA concentrations of digested donor plasmids and any required PCR products are set such that there is an equimolar ratio of DNA modules and PCR products at a final concentration of about 8 ng/μl in the reaction. A worksheet entitled "Pooled digest and assembly" describes the mixture compositions of the restriction digests and the assembly reaction if the donor plasmids can be pooled dependent on the use of the same restriction enzyme. The worksheet entitled "Digest" and the worksheet entitled "Assembly" describe the mixture compositions of the restriction digests and the assembly reaction, respectively, if the donor plasmids are to be digested separately. The cells with green font, in particular those corresponding to DNA concentrations, must be edited according to the specific experiment.

## SUPPLEMENTARY TABLES

**Table S1.** Strains and conjugal plasmids

| Plasmid or strain                                   | Relevant characteristic                                                                                       | Source                |
|-----------------------------------------------------|---------------------------------------------------------------------------------------------------------------|-----------------------|
| <b>Conjugal and helper plasmids</b>                 |                                                                                                               |                       |
| pRL443                                              | Conjugal plasmid, Km <sup>s</sup> derivative of RP4, Ap <sup>r</sup> Tc <sup>r</sup>                          | (3)                   |
| pRK2013                                             | Conjugal plasmid, derivative of RK2, Km <sup>r</sup>                                                          | (4,5)                 |
| pRL623                                              | Helper plasmid carrying Mob <sub>ColK</sub> and methylase genes M.Aval, M.Eco47II, M.EcoT22I, Cm <sup>r</sup> | (3)                   |
| pRL1045                                             | Helper plasmid carrying Mob <sub>ColK</sub> and methylase genes M.Aval, M.Eco47II, Km <sup>r</sup>            | (3)                   |
| <b>Cyanobacterial strains (abbreviation)</b>        |                                                                                                               |                       |
| <i>Anabaena</i> sp. PCC7120 (A. PCC7120)            | Wild type                                                                                                     | Laboratory Collection |
| <i>Leptolyngbya</i> sp. BL0902 (L. BL0902)          | Wild type                                                                                                     | (6)                   |
| <i>Nostoc punctiforme</i> ATCC29133 (N. ATCC29133)  | Wild type                                                                                                     | Michael L. Summers    |
| <i>Synechococcus elongatus</i> PCC7942 (S. PCC7942) | Wild type                                                                                                     | Laboratory Collection |
| <i>Synechococcus</i> sp. CC9311 (S. CC9311)         | Wild type                                                                                                     | (7)                   |
| <i>Synechococcus</i> sp. CC9605 (S. CC9605)         | Wild type                                                                                                     | (8)                   |
| <i>Synechocystis</i> sp. PCC6803 (S. PCC6803)       | Wild type                                                                                                     | Laboratory Collection |
| <i>Synechocystis</i> sp. WHSyn (S. WHSyn)           | Wild type                                                                                                     | Brian Palenik         |
| <b><i>E. coli</i> strains</b>                       |                                                                                                               |                       |
| <i>E. coli</i> DH5α                                 | Cloning host                                                                                                  | Gibco BRL             |
| <i>E. coli</i> DH10B                                | Cloning host                                                                                                  | Gibco BRL             |
| <i>E. coli</i> HB101                                | Cloning host                                                                                                  | Gibco BRL             |
| <i>E. coli</i> ED8654                               | Cloning host                                                                                                  | (9)                   |
| <i>E. coli</i> TOP10                                | Cloning host                                                                                                  | Invitrogen            |
| <i>E. coli</i> ccdB survival                        | Cloning host                                                                                                  | Invitrogen            |
| <i>E. coli</i> AM0186                               | ED8654 harboring pRL443, Ap <sup>r</sup> Tc <sup>r</sup>                                                      | (3)                   |
| <i>E. coli</i> AM1219                               | HB101 harboring pRL1045, Km <sup>r</sup>                                                                      | (3)                   |
| <i>E. coli</i> AM1358                               | DH10B harboring pRL623, Cm <sup>r</sup>                                                                       | (10)                  |
| <i>E. coli</i> AM1359                               | DH10B harboring pRL623 and pRL443, Cm <sup>r</sup> Ap <sup>r</sup> Tc <sup>r</sup>                            | (11)                  |
| <i>E. coli</i> AM4415                               | DH10B harboring pRK2013, Km <sup>r</sup>                                                                      | (6)                   |

**Table S2.** Summary of devices organized according to the GC-adaptors

| Device category                                                                                                                                                                                                                                                                                                              | # Devices <sup>a</sup> | R.E. <sup>b</sup> | GC-adaptors        | Adaptor sequences <sup>c</sup>                   |
|------------------------------------------------------------------------------------------------------------------------------------------------------------------------------------------------------------------------------------------------------------------------------------------------------------------------------|------------------------|-------------------|--------------------|--------------------------------------------------|
| <b>Cyanobacterial replicons</b> (PDU1S, PDU1M, PDU1L, PDU1SZ, PDU1LZ, PFDA, PFDAZ, PDC1, PDC1Z, PANS)                                                                                                                                                                                                                        | 11, 3                  | <i>Zral</i>       | G5C5- <i>Xba</i> I | 5' - <b>GACGTC</b> GGGGGCCCCGGGGGATtctaga-3'     |
|                                                                                                                                                                                                                                                                                                                              |                        |                   | <i>Sac</i> I-C3G3  | 5' - <b>GACGTC</b> GGGCCCCGGGCCCGGGATgagctc-3'   |
| <b><i>E. coli</i> origin for knockout plasmids</b> (ORI-BOM-KO, ORI-BOM-KO-SACB)                                                                                                                                                                                                                                             | 2, 2                   |                   |                    |                                                  |
| <b><i>E. coli</i> origin to be assembled with a cyanobacterial replicon</b> (ORI-PMB1, ORI-PBAV1K)                                                                                                                                                                                                                           | 2, 2                   | <i>EcoRV</i>      | C3G3- <i>Mfe</i> I | 5' - <b>GATATC</b> CCCCGGGCCCCGGGCCCGATcaattg-3' |
|                                                                                                                                                                                                                                                                                                                              |                        |                   | <i>Nhe</i> I-GC    | 5' - <b>GATATC</b> CGCGCGCGCGCGCGCGATgctagc-3'   |
| <b>Broad-host-range replicon</b> (RSF1010, RSF1010Y25F, RSF1010Y25FK14*)                                                                                                                                                                                                                                                     | 3, 3                   | <i>Zral</i>       | G5C5- <i>Xba</i> I | 5' - <b>GACGTC</b> GGGGGCCCCGGGGGATtctaga-3'     |
|                                                                                                                                                                                                                                                                                                                              |                        |                   | <i>Nhe</i> I-GC    | 5' - <b>GATATC</b> CGCGCGCGCGCGCGCGATgctagc-3'   |
| <b>Neutral sites</b> (S7942NS1, S7942NS2, S7942NS3, S7942NS1-RK2BOM, S7942NS2-RK2BOM, S7942NS3-RK2BOM, S7942NS1-TC, S7942NS2-TC, A7120NS1-SACB, A7120NS2-SACB)                                                                                                                                                               | 10,8                   |                   |                    |                                                  |
| <b>Antibiotic resistance markers</b> (AACC1, AADA, APHA1, BLA, BLA_A7120, BLA_S7942, CAT_A7120, CAT_S7942, ERM, HYGRO_A7120, HYGRO_S7942, NAT_A7120, NAT_S7942, NPTII, NPTII_A7120, PURO_A7120, PURO_S7942)                                                                                                                  | 17, 17                 | <i>EcoRV</i>      | GC- <i>Nhe</i> I   | 5' - <b>GATATC</b> CGCGCGCGCGCGCGCGGATgctagc-3'  |
|                                                                                                                                                                                                                                                                                                                              |                        |                   | <i>Age</i> I-C2G   | 5' - <b>GATATC</b> CGGCGGCGGCGGCGGGATaccggt-3'   |
| <b>Cloning cassettes</b> (CCDB-SWAI)                                                                                                                                                                                                                                                                                         | 1, 1                   | <i>EcoRV</i>      | C2G- <i>Age</i> I  | 5' - <b>GATATC</b> CCGCCGCCGCCCGGATaccggt-3'     |
| <b>Expression cassette</b> (PNI-CATCCDB-PMEI, CPTRC-GATEWAY)                                                                                                                                                                                                                                                                 | 2, 0                   |                   | <i>Xba</i> I-G5C5  | 5' - <b>GATATC</b> CCCCGGGGGCCCCGATtctaga-3'     |
| <b>Reporter cassette</b> (AHDI-YEMGFP, CATCCDB-AHDI-YEMGFP, CCDB-SWAI-ILOV-S7942, ZRAI-RIBOJ-YFP, CCDB-ZRAI-RIBOJ-YFP)                                                                                                                                                                                                       | 5, 2                   |                   |                    |                                                  |
| <b>Promoter-reporter module</b> (PCONII-GFPMUT2, PCONII-YEMGFP, PCONII-YFP, PCONII-ECFP, PPSBAI-GFPMUT2, PPSBAI-YFP, PPHOA-GFPMUT2, PPHOA-YFP, PISIA-GFPMUT2, PISIA-YFP, PCONII-SWAI-RIBOJ-YFP, PCONII-SWAI-RIBOJ-ECFP, PCONII-SSPI-RIBOJ-YFP, PCONII-SSPI-RIBOJ-ECFP, PCONII-SWAI-YFP, PCONII-SWAI-ECFP, PCONII-ILOV_S7942) | 17, 15                 |                   |                    |                                                  |

<sup>a</sup> The numbers of devices are presented as follows: # constructed, # tested.

<sup>b</sup> Restriction enzyme to be used for releasing the device from the donor plasmid.

<sup>c</sup> The *EcoRV* or *Zral* restriction site to release the device from the donor plasmid is written in bold and uppercase, the core of the adaptor sequence is written in uppercase and an additional restriction site is written in lowercase.

**Table S3.** Assembled shuttle plasmids to evaluate antibiotic resistance markers and variants of the RSF1010 replicon in 4 different strains of cyanobacteria

| Strain | Plasmid | Plasmid components                                   | P.A.E. | S. PCC7942 | A. PCC7120 | L. BL0902 | S. PCC6803 |
|--------|---------|------------------------------------------------------|--------|------------|------------|-----------|------------|
| AM4913 | pCV0025 | NS1TC* <b>aadA</b> *PconII-yfp                       | 12/12  | +          |            |           |            |
| AM4915 | pCV0027 | NS1TC* <b>aphI</b> *PconII-yfp                       | 7/7    | +          |            |           |            |
| AM4914 | pCV0026 | NS1TC* <b>aacC1</b> *PconII-yfp                      | 5/6    | +          |            |           |            |
| AM4918 | pCV0030 | NS1TC* <b>bla_A7120</b> *PconII-yfp                  | /      | +          |            |           |            |
| AM4919 | pCV0031 | NS1TC* <b>bla_S7942</b> *PconII-yfp                  | 5/7    | (+)        |            |           |            |
| AM4916 | pCV0028 | NS1TC* <b>cat_A7120</b> *PconII-yfp                  | 6/6    | +          |            |           |            |
| AM4917 | pCV0029 | NS1TC* <b>cat_S7942</b> *PconII-yfp                  | 6/6    | +          |            |           |            |
| AM4920 | pCV0032 | NS1TC* <b>nat1_A7120</b> *PconII-yfp                 | 6/6    | +          |            |           |            |
| AM4921 | pCV0033 | NS1TC* <b>nat1_S7942</b> *PconII-yfp                 | 6/6    | +          |            |           |            |
| AM4889 | pCV0001 | <b>RSF1010Y25F</b> * <b>aadA</b> *PconII-GFPmut2     | /      |            | +          | +         | +          |
| AM4891 | pCV0003 | RSF1010Y25F* <b>aphI</b> *PconII-GFPmut2             | /      |            | +          | +         | +          |
| AM4890 | pCV0002 | RSF1010Y25F* <b>aacC1</b> *PconII-GFPmut2            | /      |            | +          | +         | +          |
| AM4894 | pCV0006 | RSF1010Y25F* <b>bla_A7120</b> *PconII-GFPmut2        | /      |            | (+)        | (+)       | (+)        |
| AM4895 | pCV0007 | RSF1010Y25F* <b>bla_S7942</b> *PconII-GFPmut2        | /      |            | (+)        | (+)       | (+)        |
| AM4892 | pCV0004 | RSF1010Y25F* <b>cat_A7120</b> *PconII-GFPmut2        | 3/3    |            | +          | +         | +          |
| AM4893 | pCV0005 | RSF1010Y25F* <b>cat_S7942</b> *PconII-GFPmut2        | /      |            | +          | +         | +          |
| AM4896 | pCV0008 | RSF1010Y25F* <b>nat1_A7120</b> *PconII-GFPmut2       | 3/3    |            | +          | +         | +          |
| AM4897 | pCV0009 | RSF1010Y25F* <b>nat1_S7942</b> *PconII-GFPmut2       | 3/3    |            | +          | +         | +          |
| AM4996 | pCV0085 | <b>RSF1010WT</b> * <b>aadA</b> *PconII-GFPmut2       | 1/1    |            | +          | +         | +          |
| AM4962 | pCV0074 | <b>RSF1010Y25FK14</b> ** <b>aadA</b> *PconII-GFPmut2 | /      |            | +          | +         | -          |

+ Successful transformation/conjugation; (+) Problematic segregation of the cargo strain; (P.A.E.) Plasmid assembly efficiency, see text for explanation. For testing in *S. PCC7942* antibiotic resistance genes were cloned into the NS1TC vector; for all other strains, the antibiotic resistance genes were cloned into the RSF1010Y25F plasmid. Gray areas block off inapplicable host/vector combinations.

**Table S4.** Assembled shuttle plasmids used to evaluate promoters and reporter genes in 4 different strains of cyanobacteria

| Strain | Plasmid | Plasmid components                              | P.A.E. | S. PCC7942 | A. PCC7120 | L. BL0902 | S. PCC6803 |
|--------|---------|-------------------------------------------------|--------|------------|------------|-----------|------------|
| AM4913 | pCV0025 | NS1TC*aadA* <b>PconII-yfp</b>                   | /      | +          |            |           |            |
| AM4922 | pCV0034 | NS1TC*aadA* <b>PconII-GFPmut2</b>               | 3/6    | ++         |            |           |            |
| AM4923 | pCV0035 | NS1TC*aadA* <b>PconII-yemGFP</b>                | 5/5    | +++        |            |           |            |
| AM4924 | pCV0036 | NS1TC*aadA* <b>PconII-eCFP</b>                  | 6/6    | -          |            |           |            |
| AM4927 | pCV0039 | NS1TC*aadA* <b>PpsbAI-GFPmut2</b>               | 4/4    | +          |            |           |            |
| AM4932 | pCV0044 | NS1TC*aadA* <b>PconII-riboJ-oRBS-YFP</b>        | 8/8    | +++        |            |           |            |
| AM4933 | pCV0045 | NS1TC*aadA* <b>PconII-oRBS-YFP</b>              | /      | +++        |            |           |            |
| AM4935 | pCV0047 | NS1TC*aadA* <b>PconII-riboJ-oRBS-eCFP</b>       | 6/6    | ++         |            |           |            |
| AM4936 | pCV0048 | NS1TC*aadA* <b>PconII-oRBS-eCFP</b>             | 8/8    | ++         |            |           |            |
| AM4903 | pCV0015 | RSF1010Y25F*aadA* <b>PconII-GFPmut2</b>         | /      |            | ++         | ++        | ++         |
| AM4899 | pCV0011 | RSF1010Y25F*aadA* <b>PconII-yfp</b>             | /      |            | -          | -         | -          |
| AM4898 | pCV0010 | RSF1010Y25F*aadA* <b>PconII-yemGFP</b>          | /      |            | -          | +++       | ++         |
| AM4900 | pCV0012 | RSF1010Y25F*aadA* <b>PconII-eCFP</b>            | /      |            | -          | -         | -          |
| AM4903 | pCV0015 | RSF1010Y25F*aadA* <b>PpsbAI-GFPmut2</b>         | 4/4    |            | ++         | +         | -          |
| AM4908 | pCV0020 | RSF1010Y25F*aadA* <b>PconII-riboJ-oRBS-YFP</b>  | 8/8    |            | +++        | +++       | +++        |
| AM4909 | pCV0021 | RSF1010Y25F*aadA* <b>PconII-oRBS-YFP</b>        | 3/3    |            | +++        | +++       | +++        |
| AM4911 | pCV0023 | RSF1010Y25F*aadA* <b>PconII-riboJ-oRBS-eCFP</b> | 8/8    |            | ++         | ++        | ++         |
| AM4912 | pCV0024 | RSF1010Y25F*aadA* <b>PconII-oRBS-eCFP</b>       | 8/8    |            | ++         | ++        | ++         |
| AM4925 | pCV0037 | NS1TC*aadA* <b>PisiA-GFPmut2</b>                | 4/4    |            | *          | *         | *          |
| AM4926 | pCV0036 | NS1TC*aadA* <b>PphoA-GFPmut2</b>                | 4/4    |            | *          | *         | *          |
| AM4901 | pCV0013 | RSF1010Y25F* <b>PisiA-GFPmut2</b>               | 4/4    |            | *          | *         | *          |
| AM4902 | pCV0014 | RSF1010Y25F *aadA* <b>PphoA-GFPmut2</b>         | 4/4    |            | *          | *         | *          |
| AM4995 | pCV0084 | NS1RK2BOM*aadA* <b>Empty</b>                    | 4/4    |            | -          | -         | -          |
| AM4967 | pCV0079 | RSF1010Y25F *aadA* <b>Empty</b>                 | 4/4    |            | -          | -         | -          |

Fluorescence levels: -, undetectable; +, dim; ++, bright; +++, very bright; \* regulated promoters, data shown in Figure 6; (P.A.E.) Plasmid assembly efficiency, see text for explanation. Gray areas block off inapplicable host/vector combinations.

## SUPPLEMENTARY FIGURES

**Figure S1.** CYANO-VECTOR assembly web portal showing (A) the portal home page, (B) an example of the map of a newly assembled plasmid, (C) its sequence, and (D) the protocol template for the assembly reaction. Any number in green can or must be adjusted according to the experiment, for example, DNA concentrations must be entered. If DNA concentrations are too high, the dilution factor (D.F.) can be adjusted. The concentration of devices in the assembly reaction should be about 8 ng/ $\mu$ l. This can be adjusted by changing the "amount of fragment per kb". The default reaction volume of 10  $\mu$ l can be changed; for example, 5- $\mu$ l volumes work well. Finally, equimolar ratios of DNA devices and PCR products (1,1,1,1) work well in most cases but can also be adjusted.

# A CYANO-VECTOR assembly portal

QUICK START GUIDE    HOME    CONTACTS & MORE    ANNOTATE & UPLOAD NEW VECTORS

SELECT THE MODULES/DEVICES:

**Cyanobacterial replicons**

- PDU1SZ
- PFDAZ
- PANS
- PDC1Z
- PDU1LZ

- Choose -

**E. coli origins**

- ORI\_PMB1
- PBAV1K

**Antibiotic markers**

- AAC1
- AADA
- APH1
- ERM
- BLA
- BLA\_A7120
- BLA\_S7942
- CAT\_A7120
- CAT\_S7942
- HYGR0\_A7120
- HYGR0\_S7942
- NAT1\_A7120
- NAT1\_S7942

- Choose -

**Expression cassettes**

- CCDB-SWAI
- PNI-CATCCDB-PMEI
- CPTRC-GATEWAY-DEST

**Broad host range replicons**

- RSF1010
- RSF1010Y2SF
- RSF1010Y2SFK14\*

**Miscellaneous**

- RK2BOM
- RK2BOMZ

**Neutral sites**

- S7942NS1-RK2BOM
- S7942NS1-TC
- A7120NS1-SACB
- S7942NS2-RK2BOM
- S7942NS2-TC
- A7120NS2-SACB
- S7942NS3-RK2BOM

- Choose -

**E. coli origins for knock out**

- ORIBOM-KO
- ORIBOM-SACB-KO

**Recombination site**

LEFT:

RIGHT:

SWAP & REVERSE/COMPLEMENT THE RECOMBINATION SITES -->

REVERSE/COMPLEMENT THE ANTIBIOTIC MARKER -->

**Promoter-reporter units**

- Choose -

**Reporter cassettes**

- CATCCDB-AHDI-YEMGFP
- CCDB-SWAI-LOW-S7942
- CCDB-ZRAI-RIBOJ-ORBS-YFP

- Choose -

**Recombination site**

LEFT:

RIGHT:

**FIND A MODULE:**

Cyanobacterial origins

- pANS - (*S. elongatus* PCC7942)
- pDC1 - (*N. punctiforme* ATCC29133)
- pDC1Z
- pDU1L - (*Anabaena* sp. PCC7120)
- pDU1LZ
- pDU1M
- pDU1S
- pDU1SZ
- pFDA - (*F. diplosiphon* PCC7601)
- pFDAZ

GB    M    S   **SHOW**

**FIND A MODULAR VECTOR:**

- RSF1010Y2SF\_AADA\_PCONII-LTRBS-GFP1
- RSF1010Y2SF\_AACC1\_PCONII-LTRBS-GFP1
- RSF1010Y2SF\_APH1\_PCONII-LTRBS-GFP1
- RSF1010Y2SF\_CAT\_A7120\_PCONII-LTRBS
- RSF1010Y2SF\_CAT\_S7942\_PCONII-LTRBS
- RSF1010Y2SF\_BLA\_A7120\_PCONII-LTRBS
- RSF1010Y2SF\_BLA\_S7942\_PCONII-LTRBS
- RSF1010Y2SF\_NAT1\_A7120\_PCONII-LTRBS
- RSF1010Y2SF\_NAT1\_S7942\_PCONII-LTRBS
- RSF1010Y2SF\_AADA\_PCONII-LTRBS-YEM
- RSF1010Y2SF\_AADA\_PCONII-LTRBS-YFP

GB    M    S   **SHOW**

**NAME YOUR MODULAR VECTOR:**

GENBANK    SEQUENCE    MAP    PROTOCOL

**RESET**   **ASSEMBLE**

**SEARCH CYANOBACTERIAL GENOMES:**

- Choose -

**DISPLAY\_SEQUENCE**

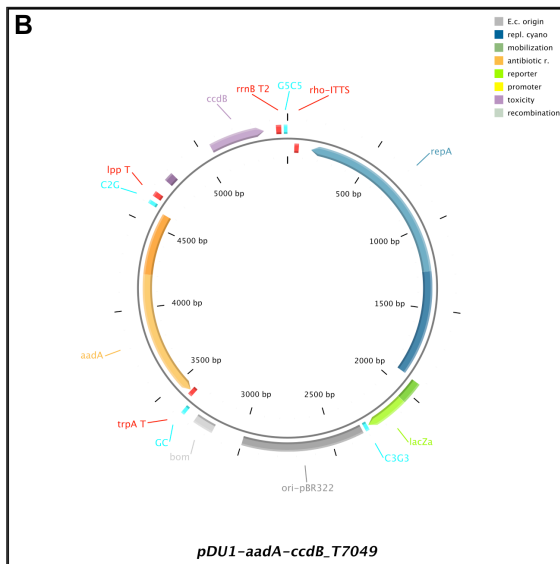

## C

```

1161 TGTATTTACTAACTGAATTCGCGGTGACGCTTTTACAGATGGAATTCACGGCAA
1162 AATGTTTTTGGTAACTTTGCTATGTAAACAGAAACTTGGCACTCGGTTATTACTAAA
1681 TAAACTGGTAAATAAACCATTAGAACCAAAAAGAAAGAAACCACTACCCCTTGCCA
1741 GTTTTCAAGCTTTTGTATGACGACTTAATAATCGGGTTTAAACCAATTCGGCTTGA
1801 AAATTTACTCTTGTACAGCAAGTAAAGTCAATGCTAAACGCACCGCTCAAAATCCTFA
1861 GTTTTCCAGTAGCGATTACCTTCTTGGTAAGTCCCGGCTTGATAGCCCAAGATGCT
1921 GAGCTCAGCGCAACGCAATTAATGTGAGTAGCTCACTCATTAGGCACCCAGGCTTAC
1981 ACTTTATGCTTCCGGCTCGTATGTTGTGGAAATGTGAGCGGATAACAATTCACACAG
2041 GAACAGCTAATGACCATGATACGGATTCACTGGCCGCTGTTTAAACAGTCGCGACTG
2101 GGAAAGCCTGGCGTTACCAACTTAATCGCCTTGGCAGCAGCATCCCCCTTGGCAGCTG
2161 CGCTAATAGCAAGAGGCGCCGACCGATCGCCCTTCCCAACAGTTGGCAGCTGAAATGG
2221 CGAATGGCGCTTGGCTGGTTTCCGGCACCAAGAGCGGTGCGGAAAGCTGGCTGGAATA
2281 GAGCTCATTCCCGGGCCCGGGCCGACAAATGAGCGTCAGACCCCGTAGAAAAGATCA
2341 AAGGATCTTCTGGAGTCTTTTTTCTCGCGGTAATCTGCTGCTTGCAAACAAAAMAA
2401 CACCGTACCAGCGGTGGTTTGTGGCGGATCAAGAGTACCAACTTTTTTCCGAGGG
2461 TAACCTGGCTCAGCAGAGCGCAGATACCAAACTGTCTTCTAGTGTAGCCGTAGTAG
2521 GCCACCACTCAAGAACTCTGAGCAGCCGCTACATACCTCGCTGCTAATCTGTTACT
2581 CAGTGGCTGCTGCAAGTGGCGATAAGTCTGCTTACCGGGTTGGACTCAAGCAGATAGT
2641 TACCGGTAAGGCGCAGCGGTGGGGTGAACGGGGGTTGCTGACACAGCCAGCTGGG
2701 AAGCGAACGACTACACCGAAGTGAATACCTACAGCGTGGCTATGAGAAAGCCAGCC
2761 TTCCGAGGAGGAGAAAGGCGGACAGGATCCGGTAGCGCGGAGGTGCGAACAGGAGAG
2821 GCACGAGGAGGCTTCCAGGGGAAACGCTGGTATCTTTATAGTCTGTGCGGTTTCCGC
2881 ACCTTGAAGTGTGAGCTGGATTTTGGTATGCTGCTCAGGGGGGGGAGCCTATGGAAA
2941 ACGCCAGCAAGCGCGCTTTTACGGTTCGCGGCTTTTGGCGCTTTTGTCTCAGATGT
3001 TCTTCTCGGTTATCCCTGATCTGTGTAACCGTATTACCGCTTTTGTAGGAGCTG
3061 ATACCGTCCGCGCAGCGAAGCAGCAGCGCGCAGCAGTCAAGTGGAGCGGAAAGCGGAA
3121 AGCGCTGATGCGGATTTTCTCTTACGCACTGGTGGGATTTTACACACGCATATGGT
3181 GCATCTCAATCAATCTGCGTGTGCGGATGCGGATGTTAAGCAGATACCTCCGCTATG
3241 GCTACGCTGCTGCTGCTGCTGCTGCTGCTGCTGCTGCTGCTGCTGCTGCTGCTGCTGCT
3301 ACGGGCTTGTCTGCTCCGGCATCCGCTTACAGCAAGCTGTAGCATCCGCGCGCGCGG
3361 CCGGATGCTGAGCGCGCGCCAAAAMAAAGCCCGCTATTAGCGGGCTGGCGGCTTGG
3421 CCGACTACTTGGGTATCTCGCTTTTCAAGTGTGGACAATCTTCAACTGATCTGGG
3481 CCGGAGCCAGCGATCTCTTCTTGGCCAAAGATAAGCCTGTCTAGCTTCAAGTATGAGC
3541 GGCTGATACTGGCGCGGCGCGGCTCCATTTGCCAGTTCGGCAGCGACATCTTGGCGCG
  
```

## D Calculation

|                                  | Device (nt)  | Vector (nt)   | Ratios | Vector (ng/ul)                           | Device (ng)     | Vector (ng) | Vector (ul) | D.F. |
|----------------------------------|--------------|---------------|--------|------------------------------------------|-----------------|-------------|-------------|------|
| pCVD055                          | 2329         | 5021          | 1      | 100                                      | 34.94           | 75.32       | 0.75        | 1    |
| pCVD026                          | 1080         | 3772          | 1      | 100                                      | 16.20           | 56.58       | 0.57        | 1    |
| pCVD002                          | 1276         | 3623          | 1      | 100                                      | 19.14           | 54.35       | 0.54        | 1    |
| pCVD015                          | 893          | 3585          | 1      | 100                                      | 13.40           | 53.78       | 0.54        | 1    |
| Amount of fragment per Kb:       |              | 15 ng         |        | 8 ng/ul of part DNA in assembly reaction |                 |             |             |      |
| Volume of the assembly reaction: |              | 10 ul         |        |                                          |                 |             |             |      |
| <b>Invitrogen - Seamless</b>     |              |               |        |                                          |                 |             |             |      |
|                                  | <b>Final</b> | <b>Stocks</b> |        | <b>Volume</b>                            |                 |             |             |      |
| Grand total/Water                | 10 ul        |               |        | 4.60 ul                                  |                 |             |             |      |
| pCVD055                          | 75.32 ng     | 100 ng/ul     |        | 0.75 ul                                  |                 |             |             |      |
| pCVD026                          | 56.58 ng     | 100 ng/ul     |        | 0.57 ul                                  |                 |             |             |      |
| pCVD002                          | 54.35 ng     | 100 ng/ul     |        | 0.54 ul                                  |                 |             |             |      |
| pCVD015                          | 53.78 ng     | 100 ng/ul     |        | 0.54 ul                                  |                 |             |             |      |
| Buffer                           | 1 x          | 5 x           |        | 2 ul                                     |                 |             |             |      |
| Enzyme                           | 1 x          | 10 x          |        | 1 ul                                     |                 |             |             |      |
|                                  |              |               |        | <b>Grand Total:</b>                      | <b>10.00 ul</b> |             |             |      |



**Figure S2.** Evaluation of conjugal efficiencies of 3 variants of the RSF1010 replicon (WT, *mobAY25F* and *mobAY25F/mobCK14\**) in *Anabaena* sp. PCC7120, *Leptolyngbya* sp. BL0902 and *Synechocystis* sp. PCC6803. Biparental matings were carried out with the same amount of cyanobacteria and *E. coli* cells for each variant (pCV0001, pCV0084, pCV0079; Table S3), and then serial dilutions of the mating mixtures were spotted on plates. The experiment was carried out with 3 biological replicates for each variants of the RSF1010 replicon (3 cultures of *E. coli* grown from 3 independent colonies) and for each mating; furthermore 2 technical replicates were carried out. The results presented were highly reproducible. Note that most of what appears as small colonies at the dilution factor 1:5 for *Synechocystis* sp. PCC6803 and the RSF1010 replicon variant *mobAY25F* are not real.

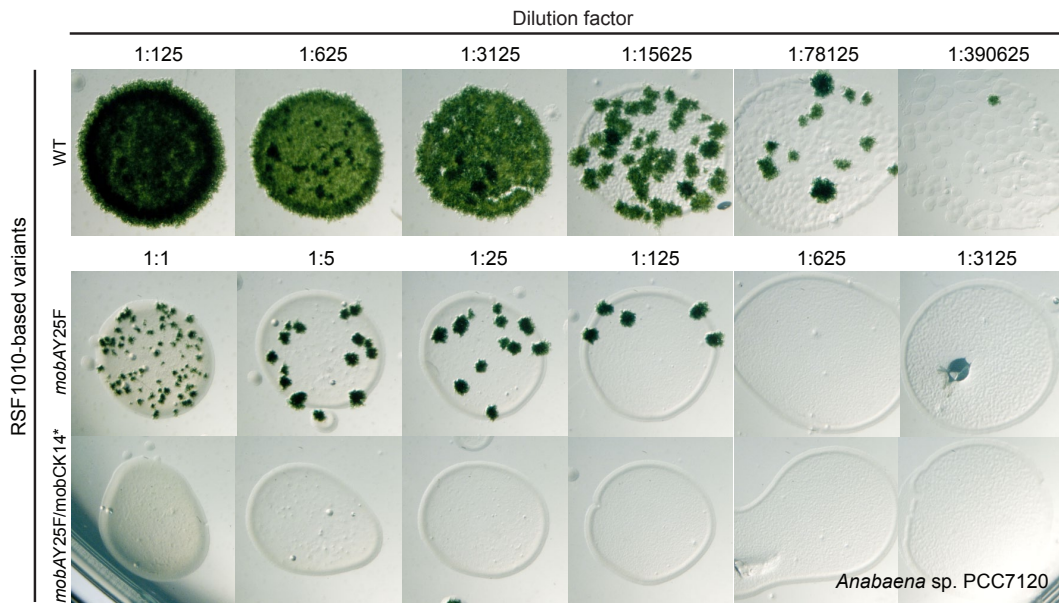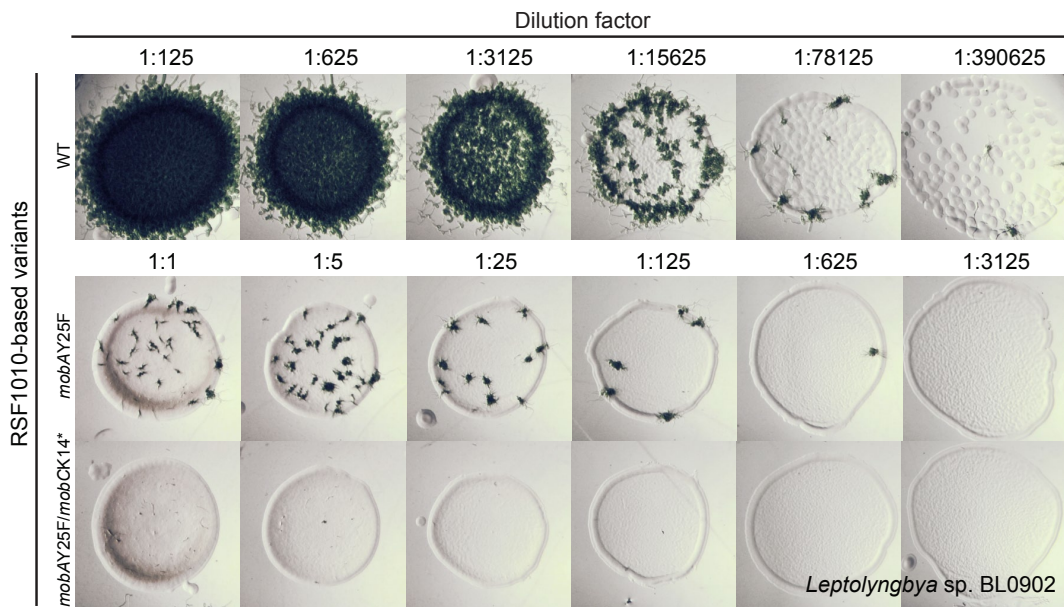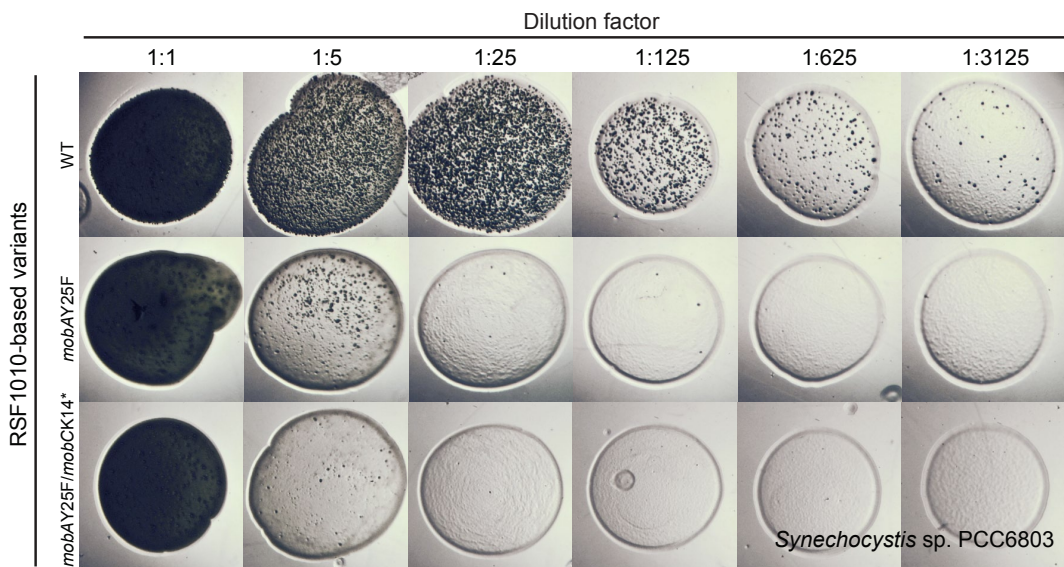

**Figure S3.** PCR assays showing the stability, presence or absence, of plasmids based on the RSF1010(*mobAY25F*) replicon in several strains of cyanobacteria. (A) Three pairs of primers (1 - *mobC\_d412R*, 5'-CGCTAAACCCACACCAAACCC-3' and *repA\_146R*, 5'-TGCAGGGCCAGCATGGATTTAC-3'; 2 - *repB\_247F*, 5'-GACCTGGATGACATGAAAGCCG-3' and *repC\_718R*, 5'-CCTCTGACGGCCAGACATAGC-3'; 3 - *mobC\_216F* 5'-GTACCTTGAACGCGACCACGAC-3' and *repC\_577F*, 5'-CGCATCAGCATGGACGAGGTG-3') were used to amplify overlapping PCR products covering the entire plasmid pCV0021 (Table S4) isolated from *E. coli*-free strains of *Anabaena* sp. PCC7120 (A7120), *Leptolyngbya* sp. BL0902 (L0902), *Synechocystis* sp. PCC6803 (S6803) and *Synechocystis* sp. WHSyn (WSyn). Transconjugant strains were grown for 4 months (L0902 and WHSyn) or 8 months (A7120 and S6803) in liquid media supplemented with 2 µg/ml of both spectinomycin and streptomycin, and were transferred in fresh medium every 2 to 4 weeks. PCR products were obtained with each pair of primers from all four transconjugant strains (upper panels) and the plasmid control (P.c., lower panels), but not from WT strains (lower panels) or a blank control (upper panels). (B) One pair of primers (GFP-FW 5'-AGTAAAGGAGAAGAACTTTTCA-3' and GFP-RV, 5'-ccgcgttccagactttacTTATTTGTATAGTTCATCCATGC-3') was used to detect the presence of pCV0003 (Table S3) in *E. coli*-free strains of *Synechococcus* sp. CC9311 and CC9605 grown over a period of 4 months after the first, third and eighth transfer of kanamycin resistant strains in fresh liquid medium supplemented with 100 µg/ml of kanamycin. After kanamycin resistant colonies were grown for 2 weeks in liquid medium, PCR products were obtained for 17 transconjugant lines whereas as many lines appeared to have acquired resistance to kanamycin without carrying the plasmid. PCR products were obtained from the plasmid control (P.c.), but not from WT strains (WT) or the blank control. After 6 weeks, PCRs carried out on 8 transconjugant lines of *Synechococcus* sp. CC9311 and CC9605 still showed the presence of the plasmid whereas the plasmid could not be detected anymore after 18 weeks. The PCRs were carried out directly on 1 µl of low-density liquid culture (boiled prior to PCRs), ~10 ng of plasmid DNA for the plasmid controls, or 1 µl of water for the blanks. See text for discussion.

A

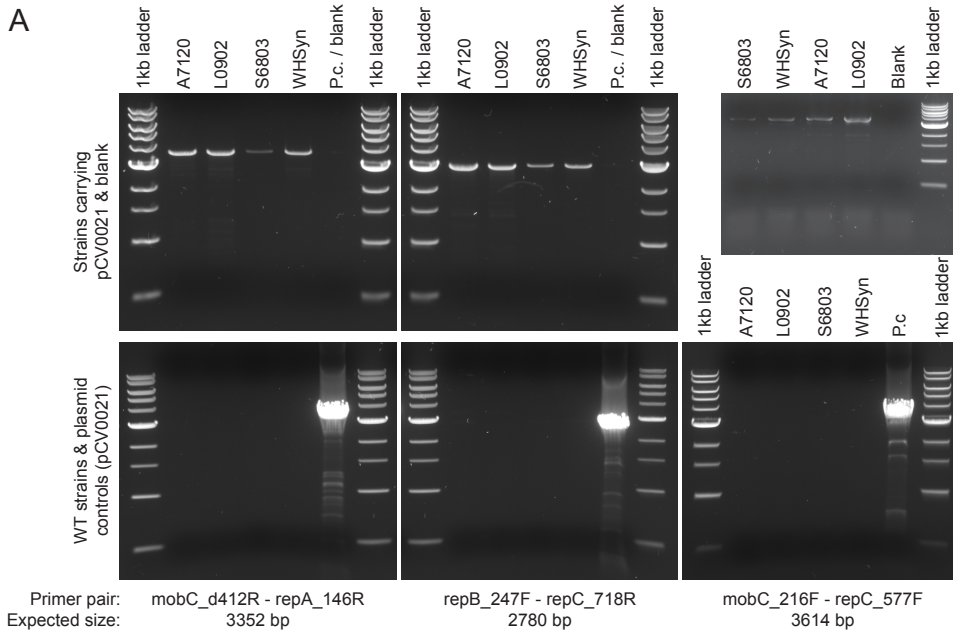

B

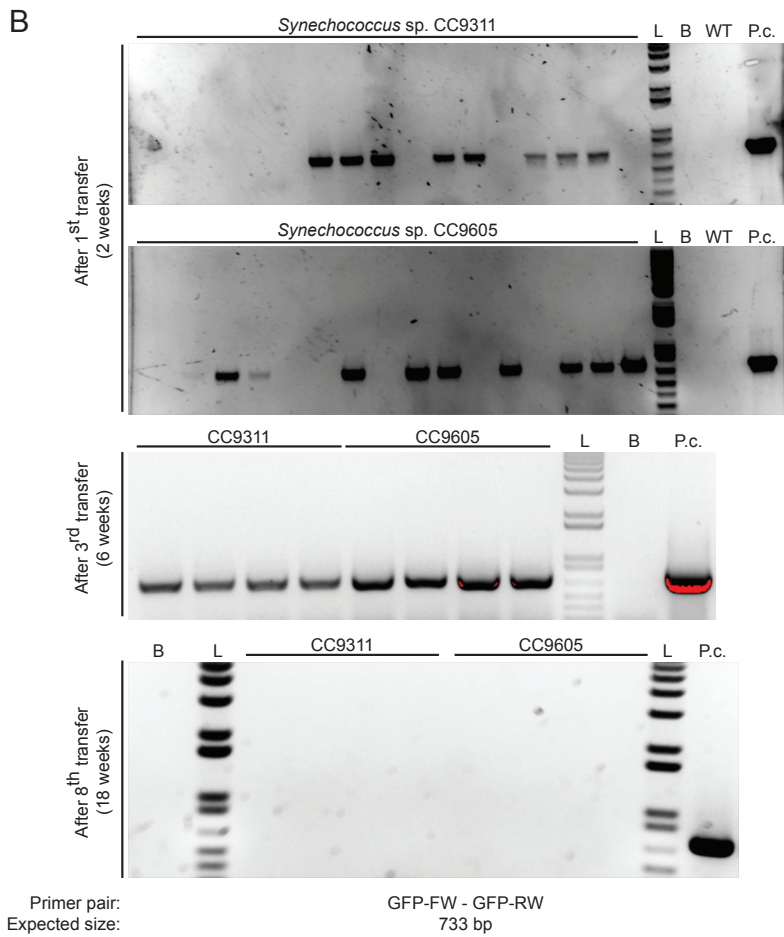

## SUPPLEMENTARY REFERENCES

1. Elhai, J., Taton, A., Massar, J.P., Myers, J.K., Travers, M., Casey, J., Slupesky, M. and Shrager, J. (2009) BioBIKE: a Web-based, programmable, integrated biological knowledge base. *Nucleic Acids Res*, **37**, W28-32.
2. Stothard, P. and Wishart, D.S. (2005) Circular genome visualization and exploration using CGView. *Bioinformatics*, **21**, 537-539.
3. Elhai, J., Vepritskiy, A., Muro-Pastor, A.M., Flores, E. and Wolk, C.P. (1997) Reduction of conjugal transfer efficiency by three restriction activities of *Anabaena* sp. strain PCC 7120. *J Bacteriol*, **179**, 1998-2005.
4. Cohen, M.F., Wallis, J.G., Campbell, E.L. and Meeks, J.C. (1994) Transposon mutagenesis of *Nostoc* sp. strain ATCC 29133, a filamentous cyanobacterium with multiple cellular differentiation alternatives. *Microbiology*, **140**, 3233-3240.
5. Wu, X., Lee, D.W., Mella, R.A. and Golden, J.W. (2007) The *Anabaena* sp. strain PCC 7120 *asr1734* gene encodes a negative regulator of heterocyst development. *Mol Microbiol*, **64**, 782-794.
6. Taton, A., Lis, E., Adin, D.M., Dong, G., Cookson, S., Kay, S.A., Golden, S.S. and Golden, J.W. (2012) Gene transfer in *Leptolyngbya* sp. strain BL0902, a cyanobacterium suitable for production of biomass and bioproducts. *PLoS ONE*, **7**, e30901.
7. Palenik, B., Ren, Q., Dupont, C.L., Myers, G.S., Heidelberg, J.F., Badger, J.H., Madupu, R., Nelson, W.C., Brinkac, L.M., Dodson, R.J. *et al.* (2006) Genome sequence of *Synechococcus* CC9311: Insights into adaptation to a coastal environment. *Proc Natl Acad Sci U S A*, **103**, 13555-13559.
8. Toledo, G. and Palenik, B. (2003) A *Synechococcus* serotype is found preferentially in surface marine waters. *Limnology and oceanography*.
9. Borck, K., Beggs, J.D., Brammar, W.J., Hopkins, A.S. and Murray, N.E. (1976) The construction in vitro of transducing derivatives of phage lambda. *Mol Gen Genet*, **146**, 199-207.
10. Liu, D. and Golden, J.W. (2002) *hetL* overexpression stimulates heterocyst formation in *Anabaena* sp. strain PCC 7120. *J Bacteriol*, **184**, 6873-6881.
11. Yoon, H.S. and Golden, J.W. (1998) Heterocyst pattern formation controlled by a diffusible peptide. *Science*, **282**, 935-938.
